# Supplementary material for: Bulk and interfacial decomposition of formamidinium iodide (HC(NH2)2I) in contact with metal oxide
Source: Royal Society of Chemistry journal article supplement (doi:10.1039/d0ma00624f), 2020-01-01
Supplement: d0ma00624f1.pdf [file d0ma00624f1.pdf]

## Supplementary Information

### Bulk and Interfacial Decomposition of Formamidinium Iodide ( $\text{HC}(\text{NH}_2)_2\text{I}$ ) in Contact with Metal Oxide

Sampreetha Thampy, †<sup>a</sup> Boya Zhang, †<sup>a</sup> Jong-Goo Park, <sup>b</sup> Ki-Ha Hong, \*<sup>b</sup> and Julia W. P. Hsu\*<sup>a</sup>

<sup>a</sup> Department of Materials Science and Engineering, University of Texas at Dallas, Richardson, TX 75080, United States

<sup>b</sup> Department of Materials Science and Engineering, Hanbat National University, Yuseong-Gu, Daejeon, 34158, Republic of Korea.

† These two authors contributed equally.

\* Corresponding authors: [jwhsu@utdallas.edu](mailto:jwhsu@utdallas.edu) and [kiha.hong@hanbat.ac.kr](mailto:kiha.hong@hanbat.ac.kr)

### Synthesis and Crystalline Phase Characterization of FAPbI<sub>3</sub>

The FAPbI<sub>3</sub> powders were synthesized following previously published results.<sup>1</sup> Briefly, 215 mg of FAI was dissolved in 5 ml acetonitrile (ACN, 99.8+%, Alfa Aesar) and then 576 mg of PbI<sub>2</sub> (FAI: PbI<sub>2</sub> = 1:1 molar ratio) was slowly added to the above mixture. The solution was stirred at room temperature for 12 h. The precipitate was washed using diethyl ether ( $\geq 99.7\%$ , Sigma-Aldrich) in sequence several times by centrifuging at 3000 rpm for 10 min and the powder was obtained by drying in a desiccator overnight. The powder was then dried in a vacuum furnace at 150 °C for 4 h. To determine the crystalline phase of FAPbI<sub>3</sub>, we performed powder X-ray diffraction (XRD) using a Rigaku Ultima III diffractometer (40 kV/44 mA) equipped with Cu K $\alpha$  radiation ( $\lambda = 1.5406 \text{ \AA}$ ). Data were collected over a  $2\theta$  range from 10° to 50° with a step size of 0.02° and a scan speed of 2°/min. The crystalline phase was identified by comparing it with the reported FAPbI<sub>3</sub> XRD pattern.<sup>1</sup> As shown in Figure S1, the XRD pattern matches well with the reported pattern for the  $\alpha$ -phase of FAPbI<sub>3</sub><sup>1</sup>, and no additional peaks corresponding to the impurity phase are observed. Thus, a pure  $\alpha$ -FAPbI<sub>3</sub> perovskite phase is obtained.

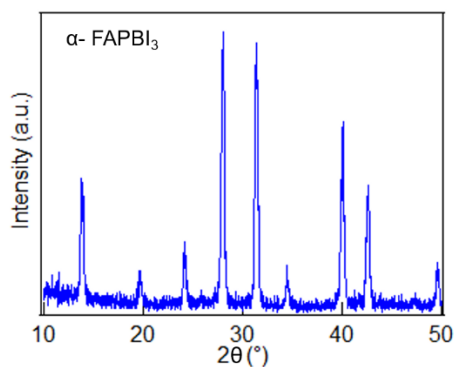

Figure S1. XRD pattern of pure phase  $\alpha$ -FAPbI<sub>3</sub> perovskite. The pattern matches well with the reported data in the literature.<sup>1</sup>

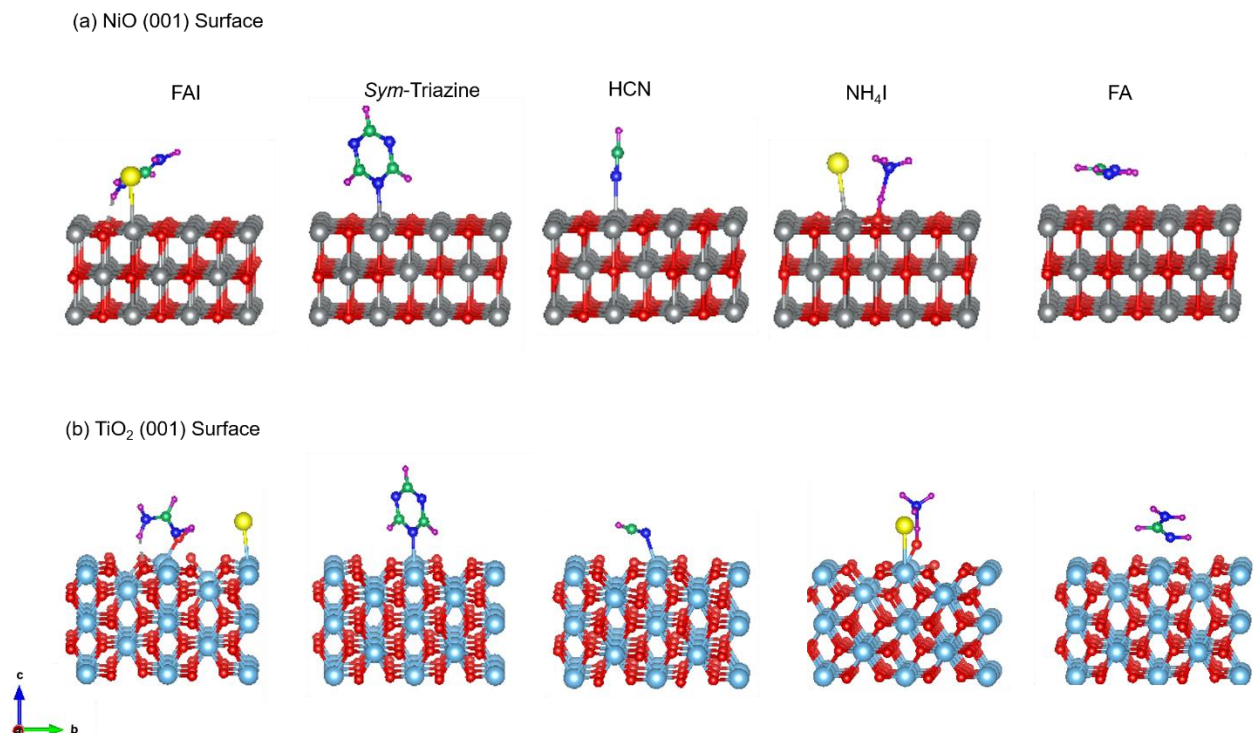

Figure S2. Adsorption configurations of FAI (FA+I), *sym*-triazine, HCN, NH<sub>4</sub>I, and FA on (a) NiO (001) and (b) TiO<sub>2</sub> (001) surfaces. Pink, royal blue, green, yellow, grey, light blue, and red balls represent the H, N, C, I, Ni, Ti, and O atoms, respectively.

The TGA-DSC curves for neat FAPbI<sub>3</sub>, FAPbI<sub>3</sub> + NiO, and FAPbI<sub>3</sub> + TiO<sub>2</sub> are shown in Figure S3. The neat FAPbI<sub>3</sub> (Figure S3a) undergoes thermal decomposition, the onset of which occurs at ~330 °C (blue dashed line) and 23% weight is lost (black curve) by ~350 °C with corresponding endothermic peak (red curve), in agreement with the weight of FAI in FAPbI<sub>3</sub> (27 %). This result is in good agreement with previous reports.<sup>2,3</sup> When FAPbI<sub>3</sub> is in contact with NiO (Figure S3b), the onset of decomposition shifts to a much lower temperature of ~220 °C (blue dashed line) with 23% weight lost by 280 °C, consistent with the amount of FAI (24%) in FAPbI<sub>3</sub> + NiO sample. In the case of FAPbI<sub>3</sub> + TiO<sub>2</sub> (Figure S3c), the onset of decomposition occurs at 260 °C (blue dashed line) and completes by 310 °C with 23% weight lost, corresponding

to the weight of FAI (24%) in the  $\text{FAPbI}_3 + \text{TiO}_2$  sample. These results indicate that metal oxide affects the thermal stability of  $\text{FAPbI}_3$  perovskite.

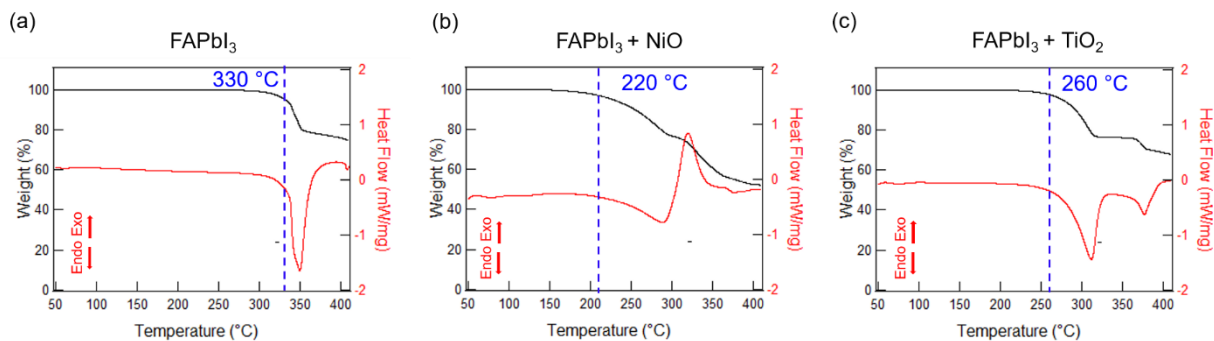

Figure S3. TGA (black, left y-axis) and DSC (red, right y-axis) curves for (a)  $\text{FAPbI}_3$ , (b)  $\text{FAPbI}_3 + \text{NiO}$  (1:1), and (c)  $\text{FAPbI}_3 + \text{TiO}_2$  (1:1) heated from 25 °C to 400 °C at 10 °C/min under 100 sccm of  $\text{N}_2$  flow. The blue dashed lines represent the onset of thermal decomposition in each case.

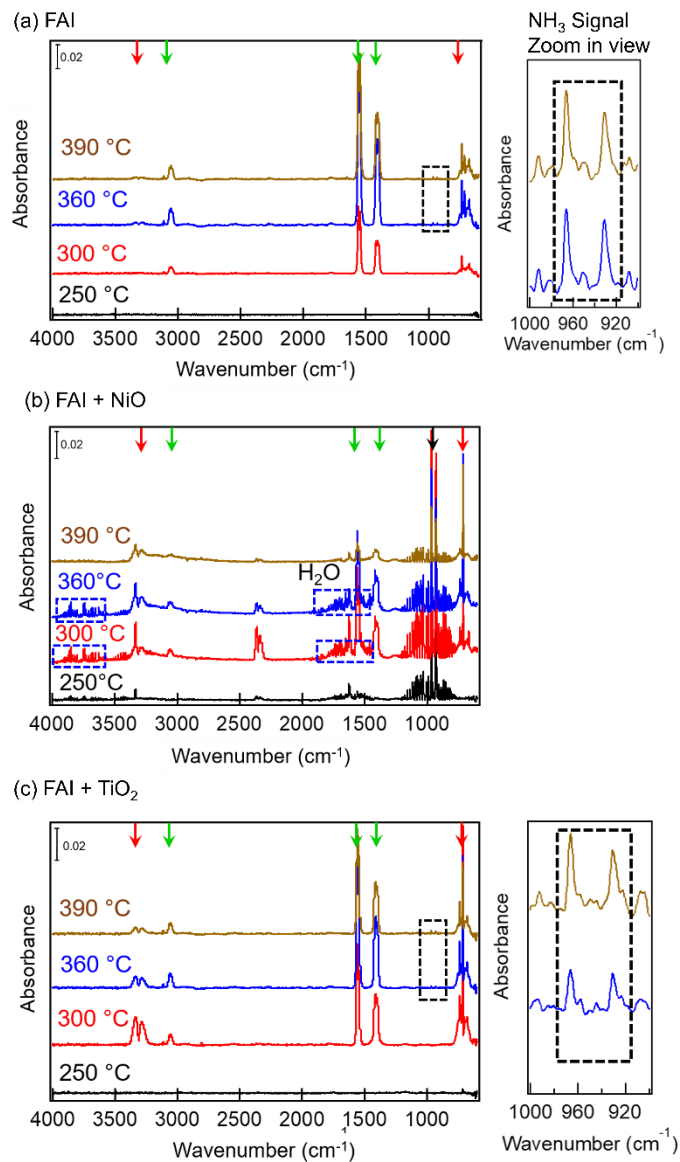

Figure S4. FTIR spectra at selected temperatures for 1:1 molar ratio of (a) FAI, (b) FAI + NiO, and (c) FAI + TiO<sub>2</sub> collected at 250 °C (black), 300 °C (red), 360 °C (blue), and 390 °C (brown). The characteristic vibrational frequencies of NH<sub>3</sub>, HCN, and *sym*-triazine ((HCN)<sub>3</sub>) gases are marked with black, red, and green arrows, respectively. The dotted black (zoom in view in (a,c)) and blue rectangles (in (b)) represent NH<sub>3</sub> and H<sub>2</sub>O, respectively. All assignments are based on NIST database.<sup>4</sup>

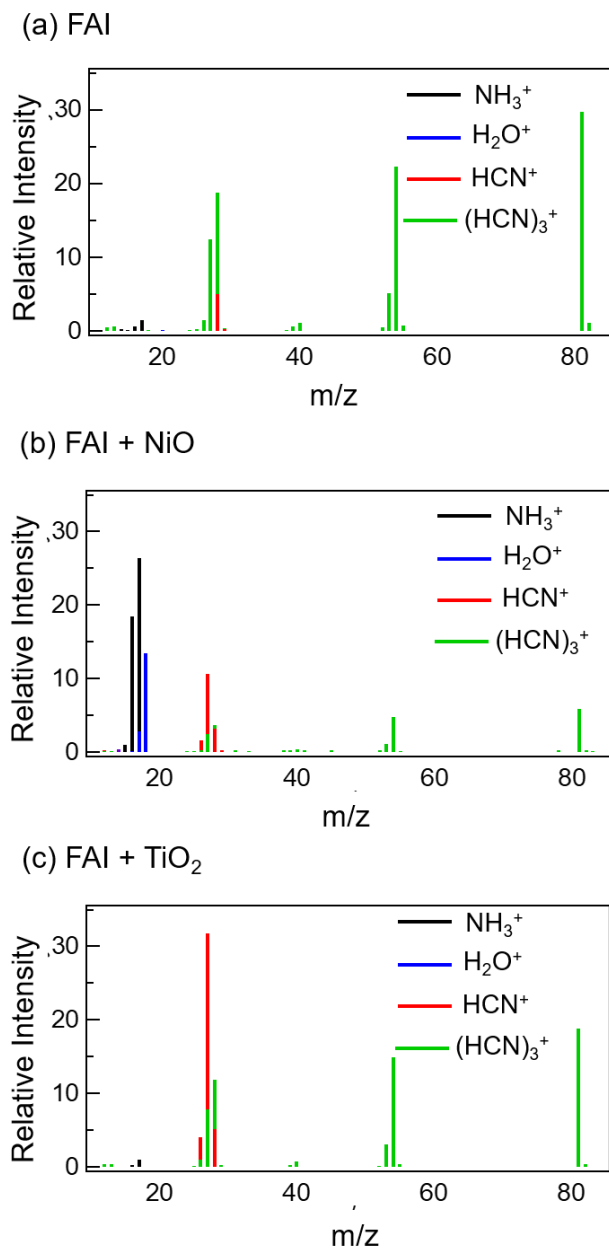

Figure S5. TPD-MS bar charts for 1:1 molar ratio of (a) FAI, (b) FAI + NiO, and (c) FAI + TiO<sub>2</sub> showing fragmentation patterns for NH<sub>3</sub><sup>+</sup>, H<sub>2</sub>O<sup>+</sup>, HCN<sup>+</sup>, and (HCN)<sub>3</sub><sup>+</sup> based on NIST database.<sup>5</sup>

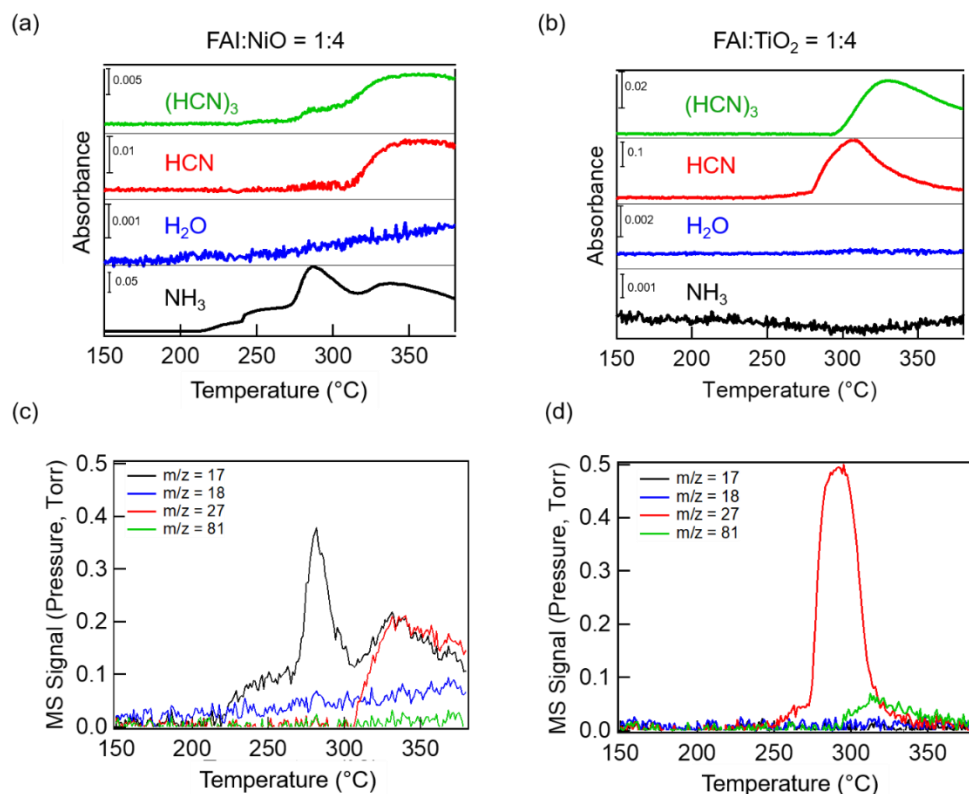

Figure S6. TPD-FTIR-MS results for 1:4 molar ratios of FAI:NiO (left) and FAI:TiO<sub>2</sub> (right). (a,b) FTIR temperature profiles and (c,d) MS temperature profiles. The black, blue, red, and green lines represent NH<sub>3</sub>, H<sub>2</sub>O, HCN, and *sym*-triazine, respectively. All assignments are based on NIST database.<sup>4,5</sup>

In Figure S7a, we present XRD patterns of neat FAI. Before heating the sample (black), the reflections of crystalline FAI (black circles) are observed. With heating, the FAI peaks decrease and by 250 °C (brown), obvious changes are observed, consistent with the onset of decomposition shown in TGA-DSC results (Figure 1a). The main peaks can be indexed to NH<sub>4</sub>I phase (maroon squares) and the minor peaks correspond to *sym*-triazine phase (green inverted triangles). On further heating to 300 °C (magenta), we see the loss of NH<sub>4</sub>I and *sym*-triazine signals, indicating the complete decomposition of the solid organic compound. When FAI is mixed with NiO (Figure S7b), before heating (black), reflections associated with crystalline FAI (black circles) and NiO (pink pentagons) are seen. After heating to 200 °C (orange), we see the appearance of new peaks

corresponding to  $\text{NiI}_2$  (violet diamonds), consistent with the onset of decomposition.  $\text{NH}_4\text{I}$  peaks (maroon squares) are also observed, but with much weaker intensity than in neat FAI. On further heating to 250 °C (brown), we see the growth of  $\text{NiI}_2$ . By 300 °C (magenta), only  $\text{NiI}_2$  peaks are evident, providing support for the interfacial reaction. In the case of FAI mixed with  $\text{TiO}_2$  (Figure S7c), the XRD patterns before heating (black) show the presence of FAI (black circles) and  $\text{TiO}_2$  (blue dumbbells). However, after heating to 250 °C (brown), only  $\text{TiO}_2$  peaks are present. No peaks corresponding to  $\text{NH}_4\text{I}$  are observed as in the case of FAI. No  $\text{TiI}_4$  is found, further validating that as FAI decomposes, there are no reactions with  $\text{TiO}_2$ .



(a) FAI

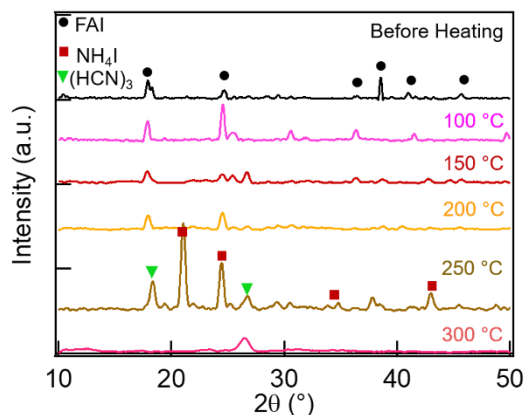

(b) FAI + NiO

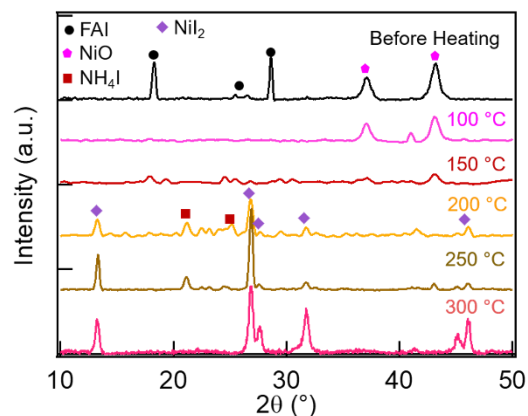(c) FAI + TiO<sub>2</sub>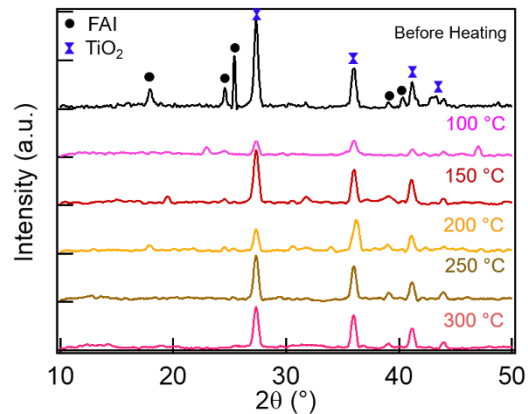

Figure S7. XRD patterns for 1:1 molar ratio of (a) FAI, (b) FAI + NiO, and (c) FAI + TiO<sub>2</sub> powders before heating (black) and after heating to 100 °C (pink), 150 °C (maroon), 200 °C (orange), 250 °C (brown), and 300 °C (magenta) for 10 min. Peaks associated with crystalline FAI, NiO, TiO<sub>2</sub>, NH<sub>4</sub>I, *sym*-triazine, and NiI<sub>2</sub> are marked by black circles, pink pentagons, blue dumbbells, maroon squares, green inverted triangles, and violet diamonds, respectively.

Table S1. Reaction energies of neat FAI, FAI on NiO(001), and FAI on TiO<sub>2</sub>(001).

|                                                                                          | Neat FAI (eV) | FAI on NiO (001) (eV) | FAI on TiO <sub>2</sub> (001) (eV) |
|------------------------------------------------------------------------------------------|---------------|-----------------------|------------------------------------|
| $\text{CH}(\text{NH}_2)_2\text{I} = \frac{1}{3}(\text{HCN})_3 + \text{NH}_3 + \text{HI}$ | 0.69          | -0.09                 | 0.42                               |
| $\text{CH}(\text{NH}_2)_2\text{I} = \text{HCN} + \text{NH}_3 + \text{HI}$                | 1.63          | 0.75                  | 1.0                                |
| $\text{CH}(\text{NH}_2)_2\text{I} = \text{NH-CH-NH}_2 + \text{HI}$                       | 0.81          | 0.35                  | 0.82                               |
| $\text{NH}_3 + \text{HI} = \text{NH}_4\text{I}$                                          | -0.45         | 0.21                  | 0.67                               |
| $\text{HCN} = \frac{1}{3}(\text{HCN})_3$                                                 | -0.94         | -0.84                 | -0.58                              |

Note that the \* symbol is neglected for molecules on NiO (001) and TiO<sub>2</sub> (001) in this table.

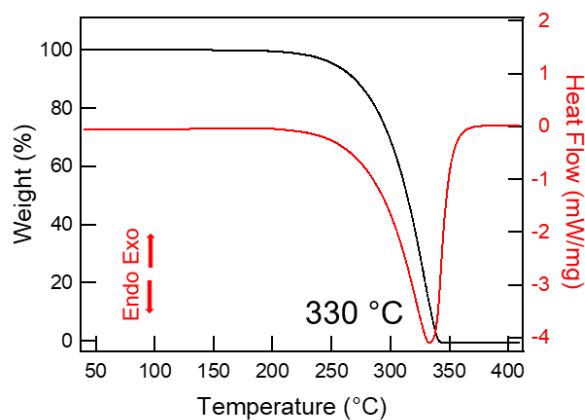

Figure S8. TGA (black, y-axis) and DSC (red, y-axis) curves for NH<sub>4</sub>I from 25 °C to 400 °C at 10 °C/min under 100 sccm N<sub>2</sub> flow.

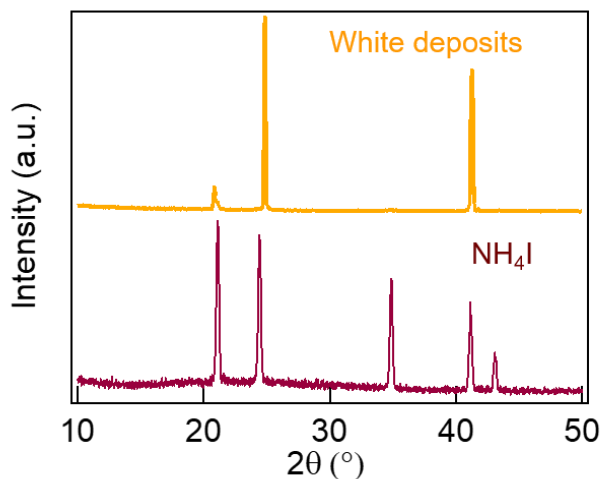

Figure S9. XRD patterns of white deposit (orange), collected from the exhaust capillary of the sample cell after TPD experiment of neat FAI and neat  $\text{NH}_4\text{I}$  powder (maroon).

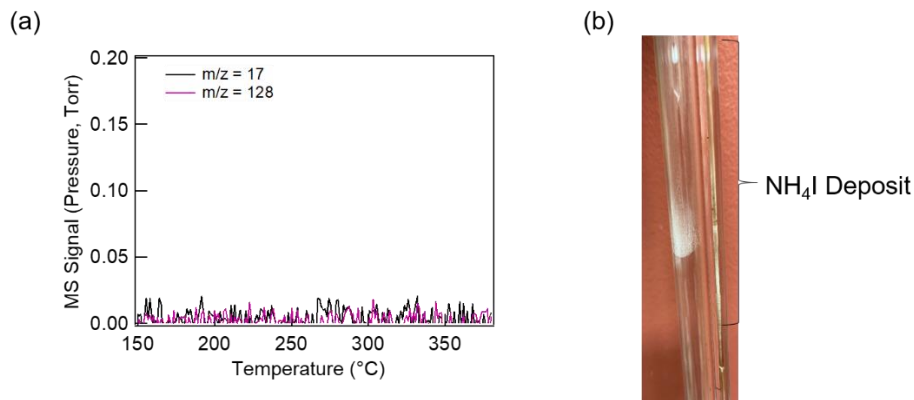

Figure S10. (a) TPD-MS temperature profile for neat  $\text{NH}_4\text{I}$ . MS signals of  $m/z = 17$  (black) and  $m/z = 128$  (purple) represent  $\text{NH}_3^+$  and  $\text{HI}^+$  parent ions, respectively. (b) Image of TPD a sample cell showing the white deposits in the exhaust capillary. Assignments are based on NIST database.<sup>5</sup>

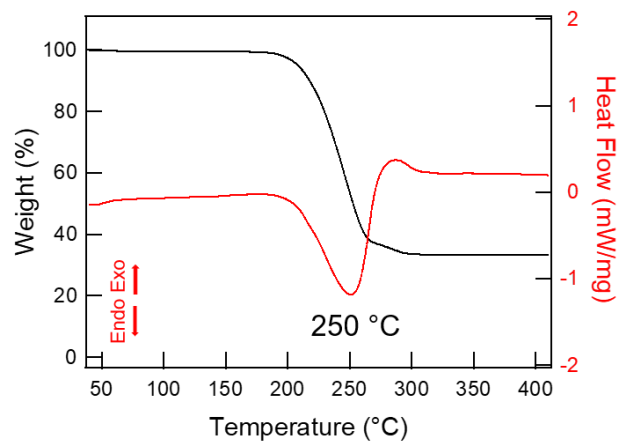

Figure S11. TGA (black, y-axis) and DSC (red, y-axis) curves for 1:1 molar ratio of  $\text{NH}_4\text{I} + \text{NiO}$  from 25 °C to 400 °C at 10 °C/min under 100 sccm  $\text{N}_2$  flow.

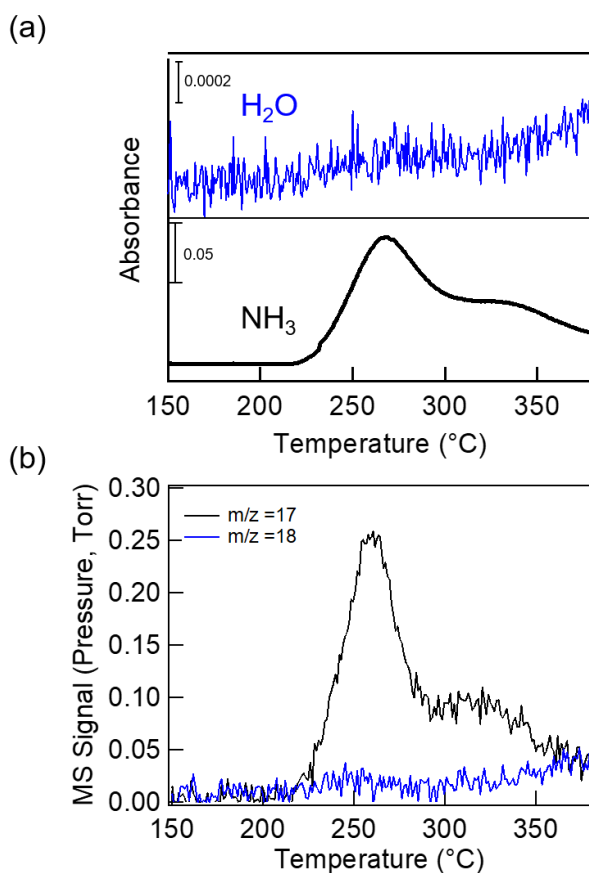

Figure S12. TPD-(a) FTIR and (b) MS temperature profiles for 1:1 molar ratio of  $\text{NH}_4\text{I} + \text{NiO}$ . The black and blue lines represent  $\text{NH}_3$  and  $\text{H}_2\text{O}$ , respectively. All assignments are based on NIST database.<sup>4,5</sup>

## References

- 1 Y. Zhang, S. G. Kim, D. K. Lee and N. G. Park, *ChemSusChem*, 2018, **11**, 1813-1823.
- 2 L. Ma, D. Guo, M. Li, C. Wang, Z. Zhou, X. Zhao, F. Zhang, Z. Ao and Z. Nie, *Chem. Mater.*, 2019, **31**, 8515–8522.
- 3 E. J. Juarez-Perez, L. K. Ono and Y. Qi, *J. Mater. Chem. A*, 2019, **7**, 16912–16919.
- 4 W. E. Wallace, 'Infrared Spectra' in *NIST Chemistry WebBook NIST Standard Reference Database Number 69*, 2017.
- 5 W. E. Wallace, 'Mass Spectra' in *NIST Chemistry WebBook NIST Standard Reference Database Number 69*, 2017.
